# Supplementary material for: NAD+ precursors prolong survival and improve cardiac phenotypes in a mouse model of Friedreich’s Ataxia
Source: PubMed Central journal article supplement (PMC11343603; doi:10.1172/jci.insight.177152), 2024-07-18
Supplement: jciinsight-9-177152-s263.pdf [file jciinsight-9-177152-s263.pdf]

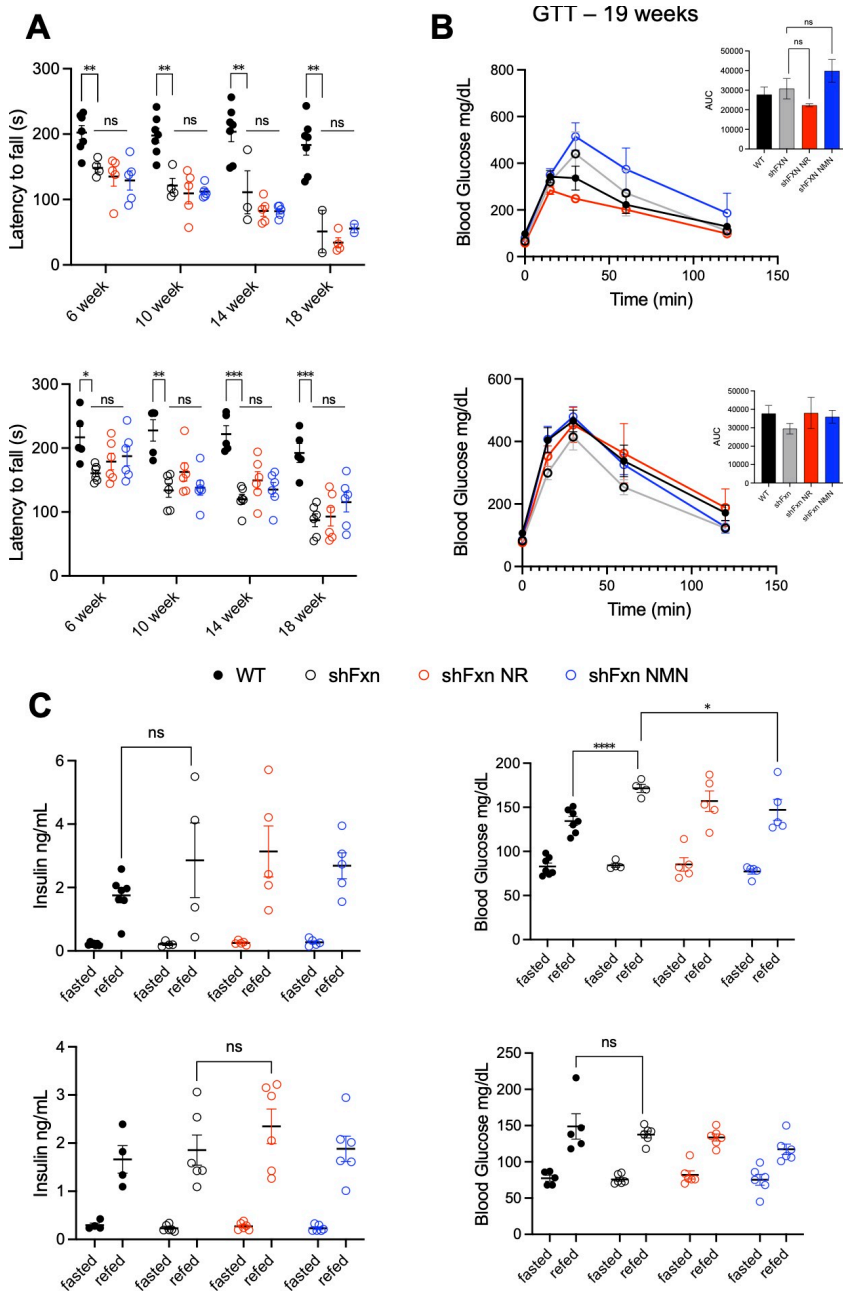

**Figure S1. Treatment with NAD<sup>+</sup> precursors does not consistently affect rotarod performance or glucose homeostasis in shFXN mice.** (a) Latency to fall on rotarod in males (top) and females (bottom) (n=2-17) (b) Glucose tolerance test at 19 weeks post-doxycycline (n=3-7) (b, insets) Area under curve for respective GTT (c) Fasting and 4-hour refeed insulin and blood glucose levels (n=4-7). (a, c: Two-Way ANOVA) (b): One-Way ANOVA) (\*= $p \leq 0.05$ , \*\*= $p \leq 0.01$ , \*\*\*= $p \leq 0.001$ , \*\*\*\*= $p \leq 0.0001$ )

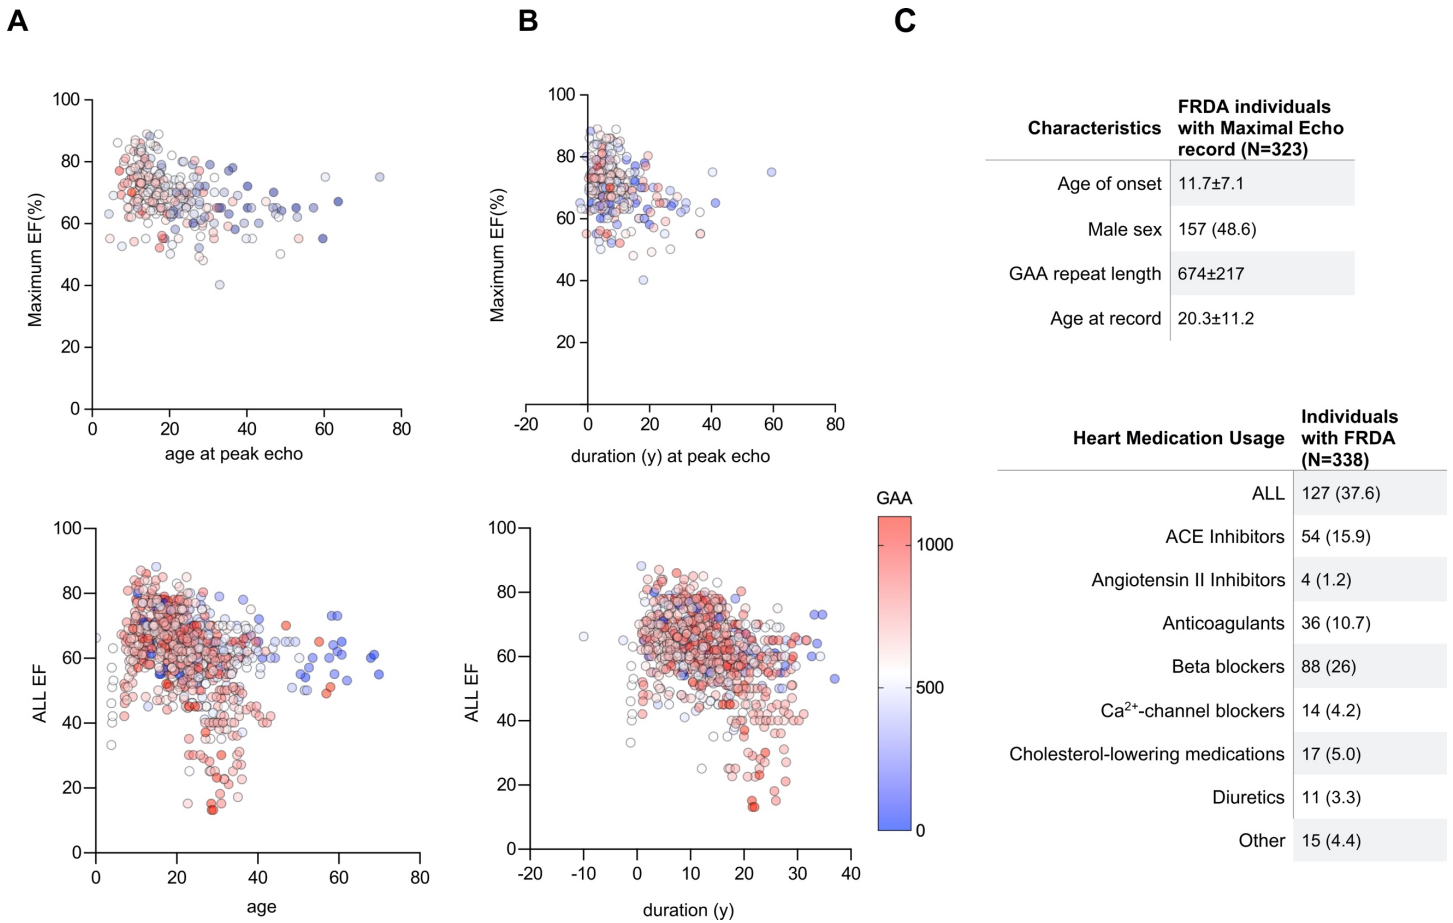

**Figure S2. High EFs are common in adolescents with FRDA while lower EFs are generally seen between 20 and 40 years of age.** (a) Maximal EF (top) and all EFs recorded over 6+ years (bottom) according to age at echocardiogram (n=330 top, n=106 bottom) (b) Maximal EF (top) and all EFs recorded over 6+ years (bottom) according to disease duration (time since diagnosis) at echocardiogram (n=330 top, 106 bottom). (c) Clinical characteristics of FRDA dataset (top) and heart medication usage tabulation (bottom) in large cohort (n=338)

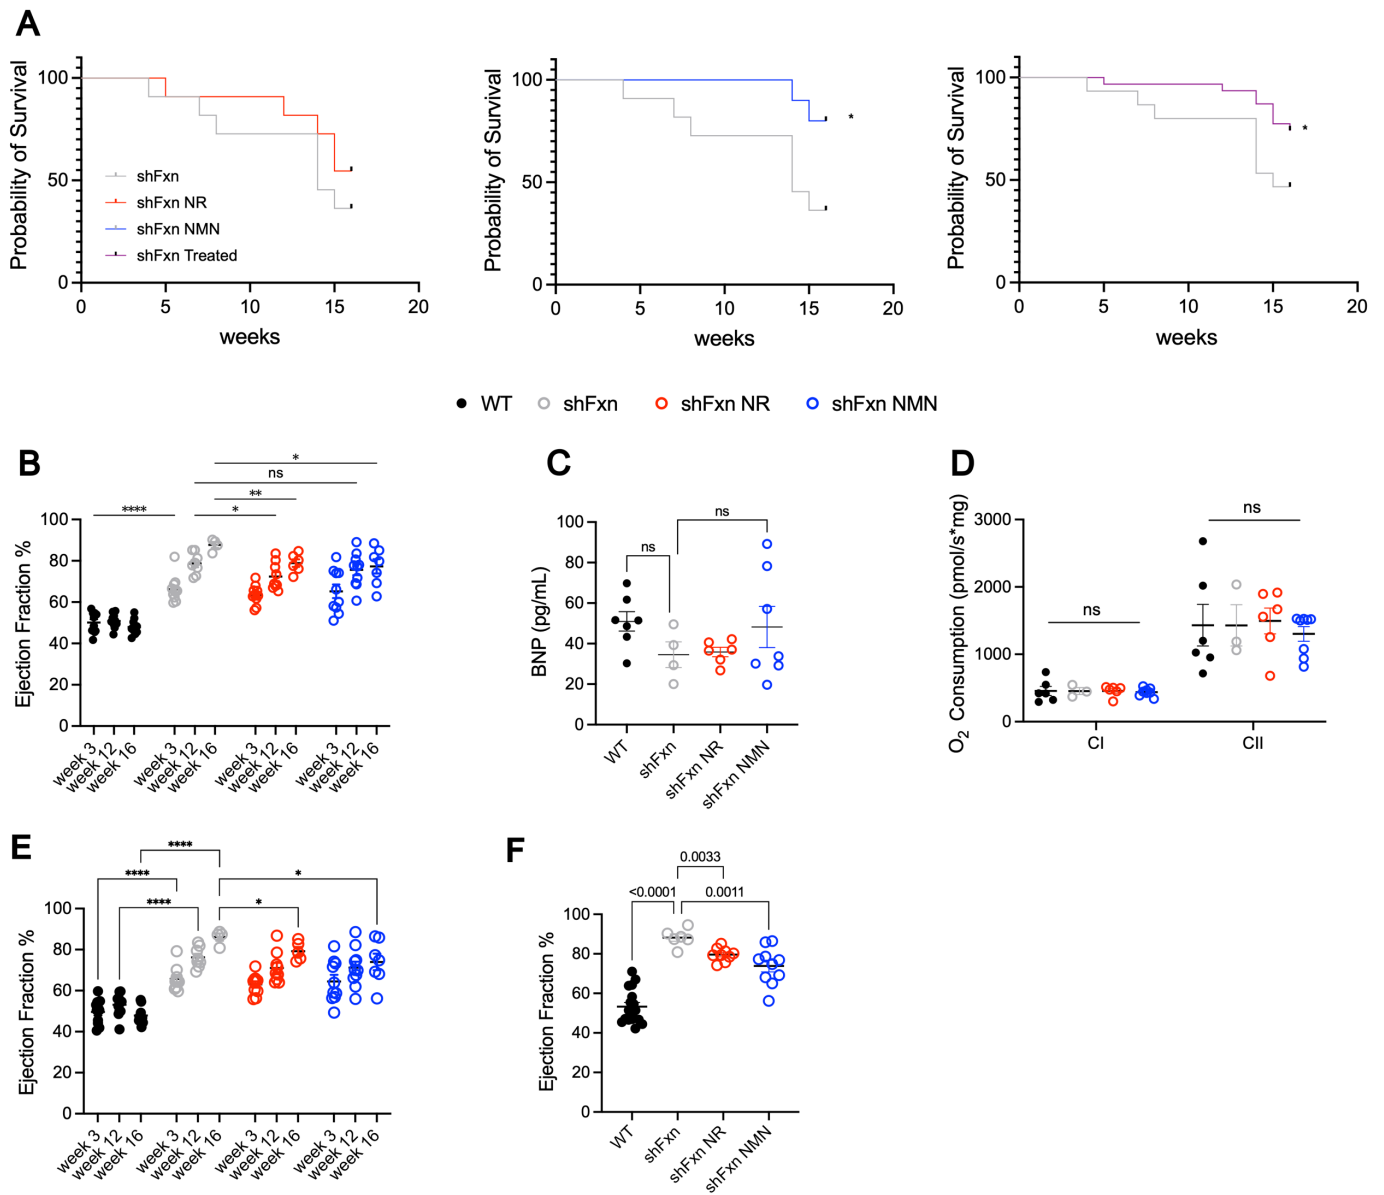

**Figure S3. Analyses restricted to the 16-week cohort and short axis only measurements** (a) Male shFxn survival curves with treatment (left, center: n=10-11, cohort 2 only, right: n=15-31 all treated) (b) Ejection fraction at 3, 12, and 16 weeks post-doxycycline (n=4-10) (c) BNP Levels in plasma at 16 weeks post-doxycycline (n=4-8) (d) Liver mitochondrial complex I and complex II respiration (n=3-8) (e) longitudinal measurement of ejection fraction calculated with short axis measurement only (f) Ejection fraction at 16-18 weeks calculated with short axis only. (a: Pairwise Mantel-Cox test for Survival) (b,d,e: Two-Way ANOVA) (c,f: One-Way ANOVA). (\*=p≤.05, \*\*=p≤0.01, \*\*\*=p≤0.001, \*\*\*\*=p≤0.0001)

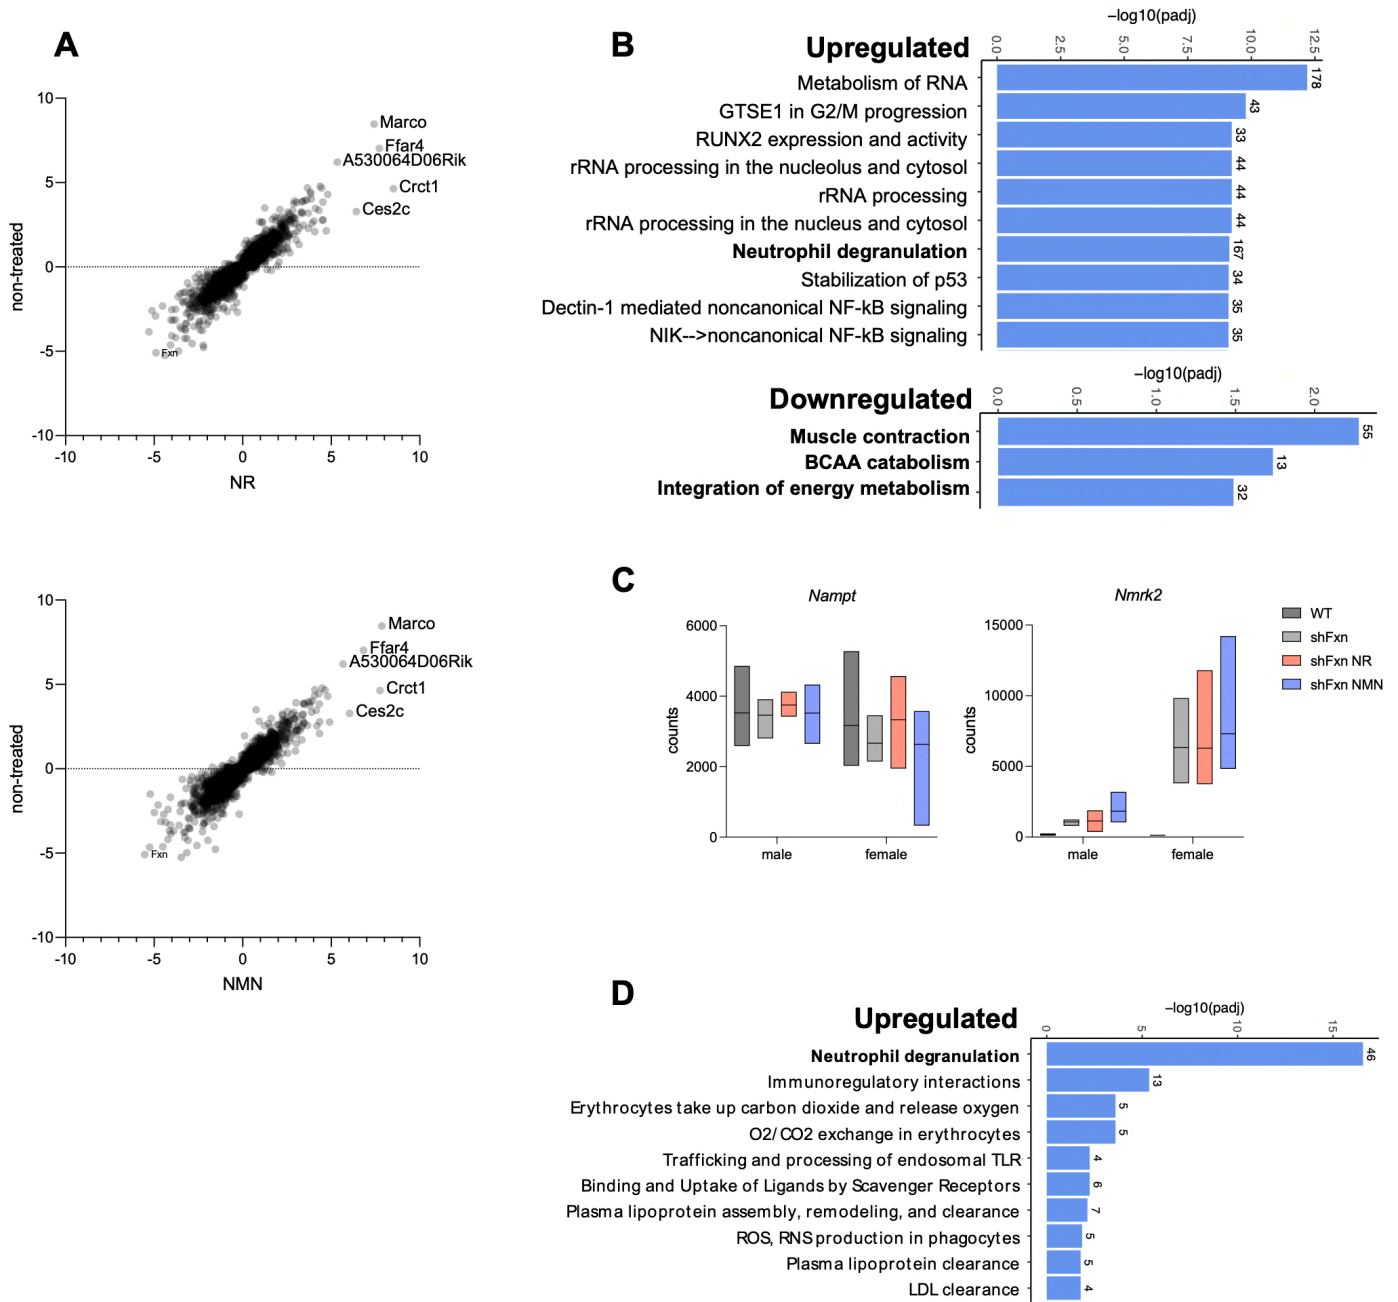

**Figure S4. Transcriptomic signatures in shFxn mice.** (a) Non-treated versus NR (top) and NMN (bottom) log<sub>2</sub>(FC) relative to WT. (b) Upregulated and downregulated reactome terms in female shFxn mice (shFxn vs WT) (c) *Nmrk2* and *Nampt* levels in male and female mice (d) Upregulated terms in 20-week (experiment 1) versus 16-week (experiment 2) shFxn male mice.

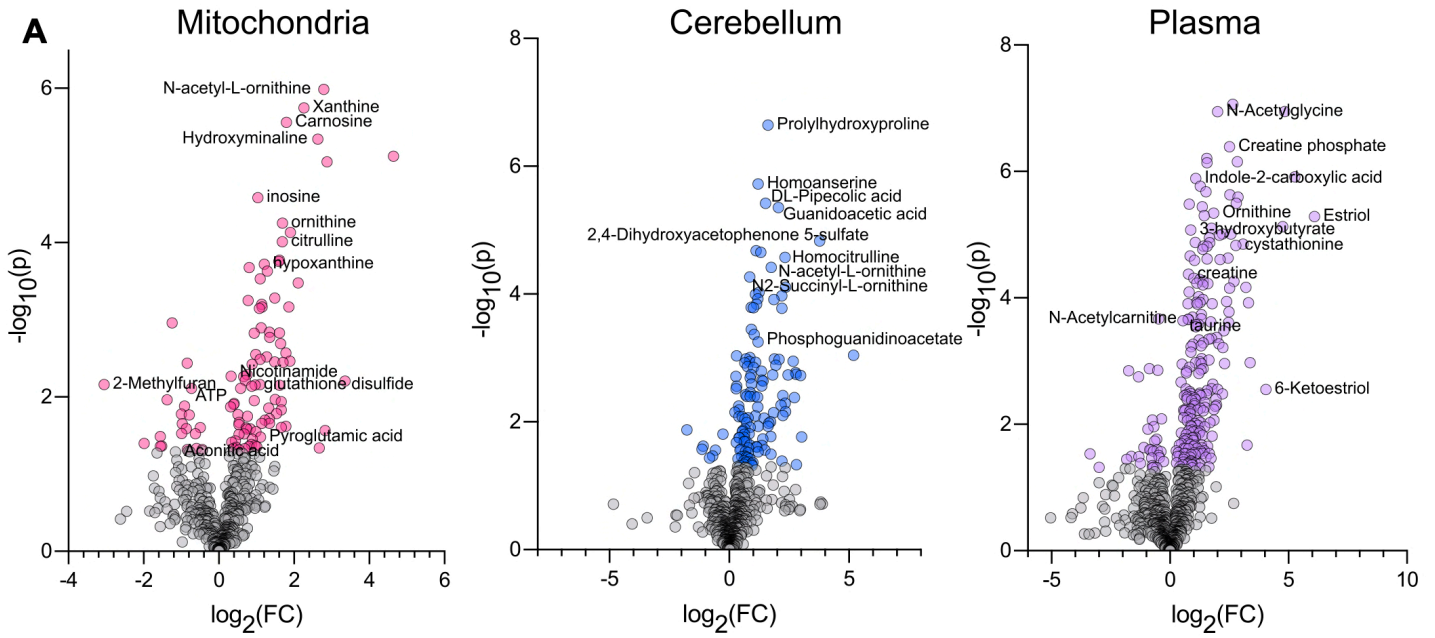

**B**

|      | Metabolite                  | log <sub>2</sub> (FC) | p       |
|------|-----------------------------|-----------------------|---------|
| TCA  | pyruvate                    | -0.20                 | ns      |
|      | citrate/isocitrate          | 0.10                  | ns      |
|      | alpha-ketoglutarate         | -0.14                 | ns      |
|      | succinate                   | -0.57                 | 2.0E-04 |
|      | fumarate                    | -0.67                 | 9.2E-05 |
|      | malate                      | -0.67                 | 5.4E-05 |
|      | aspartate                   | -0.64                 | ns      |
| BCAA | leucine/isoleucine          | -0.41                 | 3.3E-02 |
|      | valine                      | -0.45                 | 9.1E-03 |
|      | 2 methyl 3 ketovaleric acid | -1.15                 | 1.4E-02 |

**Figure S5. Metabolomic profiles of heart mitochondria, cerebellum, and plasma (a)** Volcano plot of mitochondria, cerebellum, and plasma **(b)** TCA and BCAA metabolites in heart tissue. (n=4-10, 2-tailed ttest, nominal p)

### a Mitochondria

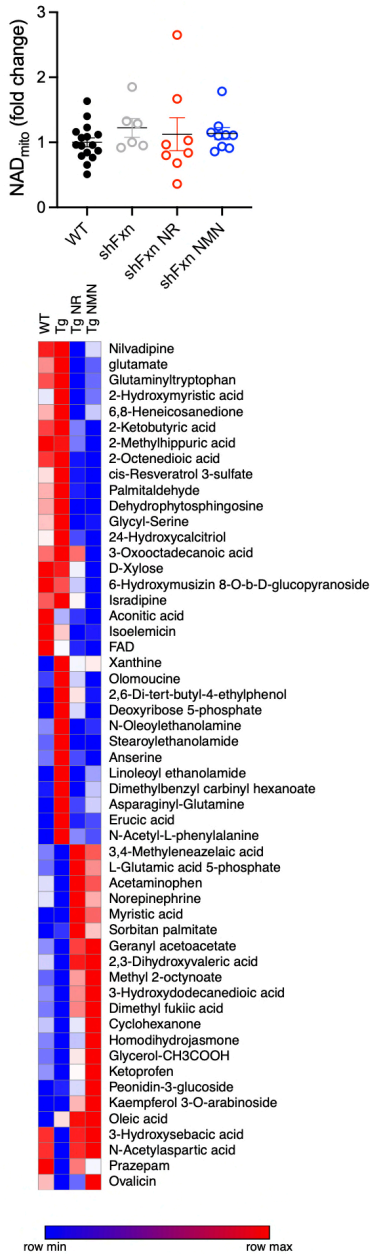

### b Cerebellum

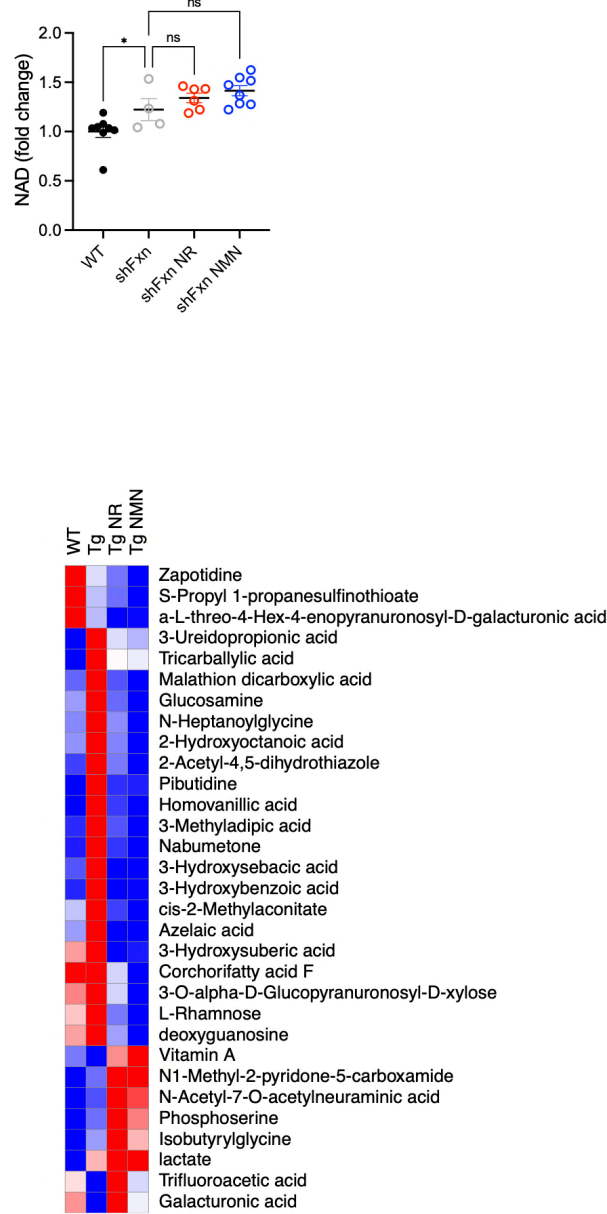

### c Plasma

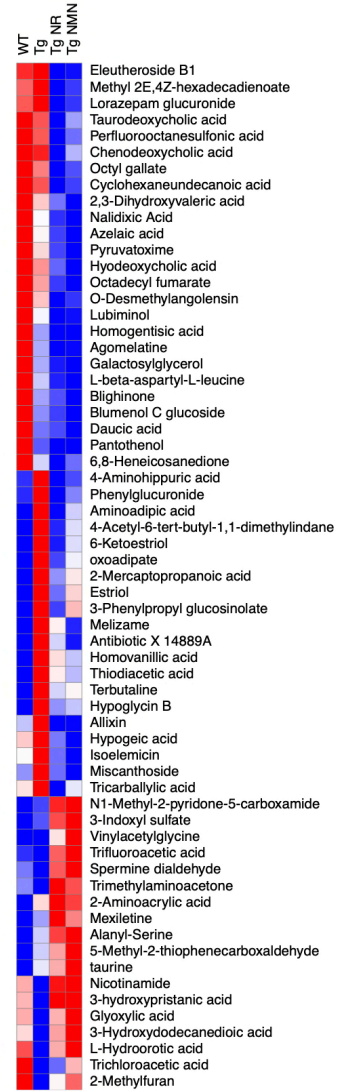

**Figure S6. Metabolic effects of NAD precursor treatments in mitochondria, cerebellum, and plasma.** (a) Mitochondrial NAD<sup>+</sup> 16-20 weeks post-doxycycline in males (b) Cerebellum NAD<sup>+</sup> 16 weeks post-doxycycline in males (c) NR and NMN changes in mitochondria, cerebellum, and plasma (n=4-10, normalized MS value, 2-tailed ttest nominal p) (\*=p≤.05, \*\*=p≤0.01, \*\*\*=p≤0.001, \*\*\*\*=p≤0.0001)

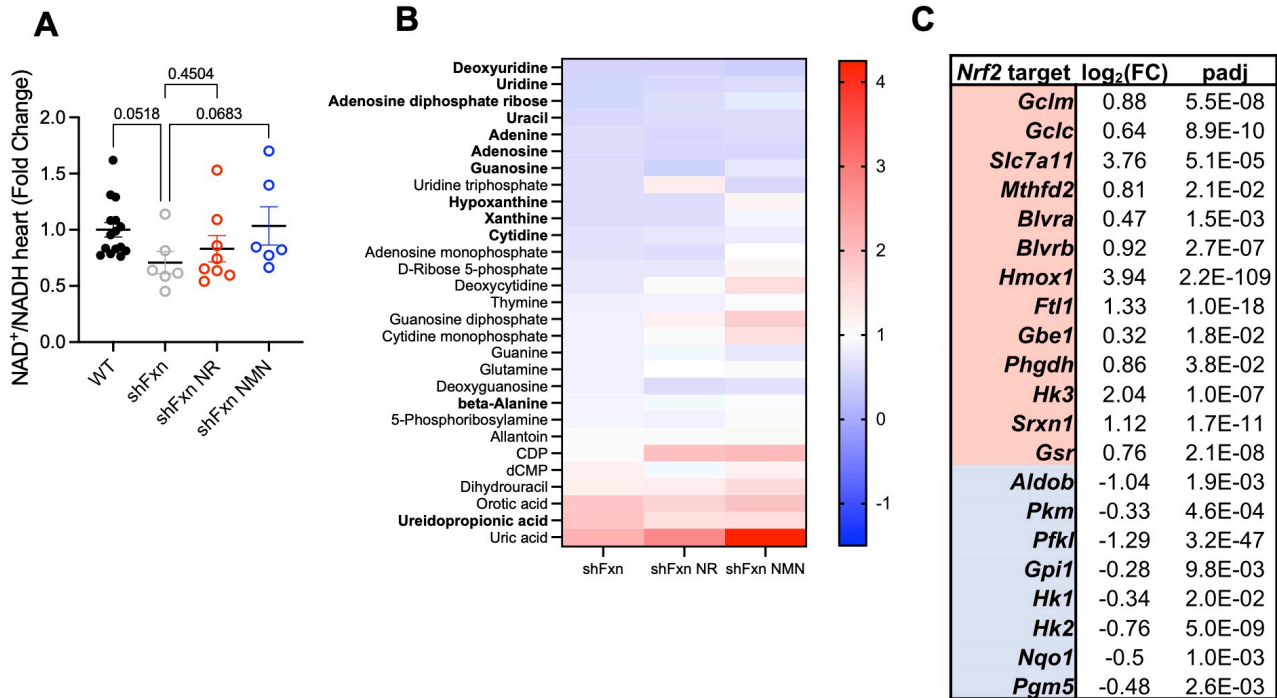

**Figure S7. Nrf2 targets are modified in shFxn mouse hearts.** (a)  $\text{NAD}^+/\text{NADH}$  ratio in male shFxn hearts ( $n=6-15$ , One-Way ANOVA) (b) de novo nucleotide synthesis metabolites (bolded are significant in WT vs shFxn,  $n=4-8$ , Unpaired 2-tailed t-test) (c) Upregulated (red) and downregulated (blue) Nrf2 targets by counts ( $n=4-5$ , Wald Test)
